# Supplementary material for: Regression-based season-ahead drought prediction for southern Peruconditioned on large-scale climate variables
Source: Copernicus journal article supplement (doi:10.5194/hess-2017-183), 2017-04-28
Supplement: Supplementary file [file hess-2017-183-AC2-supplement.pdf]

Response to Referee #2

We thank Dr. Harrigan for carefully reviewing our manuscript and providing critical and valuable comments. Please find below responses to each point raised.

**Comment:** *Throughout the text, including the title, the term ‘drought’ is used with many statements making the connection to a “hydrologic extreme” (p. 1. L. 17.) and for example “the city’s water supplies were reduced” (p. 2. L. 13-14.) etc. It took me until the last line of the introduction (excluding the abstract) to realize it was prediction of meteorological drought (precipitation) rather than hydrological drought that was being pursued. Clearly improving prediction of meteorological drought is still valid, but precipitation deficit does not necessarily propagate to a soil moisture, streamflow, and/or groundwater drought, which are more societally relevant. Often there are more complex processes at play, including temperature/evapotranspiration feedbacks. See Van Loon (2015) for more detail. This should be acknowledged and please be more explicit about the focus on meteorological drought throughout. I think if you are more explicit within the abstract and main text I would not be pedantic about asking to change the title, as it is a good title.*

**Response:** We apologize for not being clearer in our manuscript. Our goal is to create a predictive model to prognosticate meteorological drought conditions, and not necessarily consequential hydrologic drought. While these two topics are intrinsically related, we fully agree they are not interchangeable. The text of the manuscript has been changed such that meteorological drought is more explicitly stated as the focus of the research, with references to the tangential potential of hydrologic drought given meteorological drought conditions.

**Comment:** *The introduction does not do the paper justice as it fails to clearly establish core research aims/objectives/questions. The fundamental finding of the paper is that the newly created PCR model was found to be more skillful than a climatological forecast AND a simpler Niño 3.4 index-based model forecast, especially for dryer conditions – Is this not the foundation of your research question(s)? If so, needs to be in the Introduction.*

**Response:** We appreciate the opportunity to clarify our objectives in the Introduction, and propose adding the following paragraph to the manuscript:

“In this paper, we develop a season-ahead principal component regression (PCR) model to predict seasonal precipitation totals. This PCR model draws on a pool of large-scale climate variables that influence southern Peru precipitation through ocean-atmosphere teleconnections. The model is evaluated against climatology and simpler Niño index-based models to understand if the inclusion of several predictors leads to more skillful prediction, particularly for dry years in this drought-sensitive region.”

**Comment:** *Even though drought prediction remains largely unexplored in Peru, there is no background nor reference to the international literature on general seasonal forecasting methods in the introduction section, nor previous work done internationally on statistical forecasting. For example, what is the justification for selecting a statistical forecasting approach over others (i.e. lack of climate/hydrological modelling, limited hydrological data...)?*

**Response:** Statistical forecasts have been developed and evaluated for many applications globally, although more effort is still focused on the application of dynamical model predictions. There are numerous advantages for selecting statistical models for season-ahead precipitation prediction over other methods involving global atmospheric general circulation models, most notably reviewed by Xu (1999). These include GCMs inability to represent sub-grid features and dynamics, vertical level mismatches between GCMs ability and hydrology needs (atmospheric vs surface), and discrepancies in the importance placed on variables used in dynamical models. Essentially, dynamical models are exceptional tools for macroscale climate modeling, but struggle in scales similar to that of our project area. Additionally, the complex topography of the region complicates the use of GCMs for regional predictions. Although we are focused on meteorological drought and not necessarily hydrologic drought, the interconnectedness of these

two types of drought necessitates a methodology that can be justified if meteorological predictions were to be used for hydrologic application. For this case, the merits of statistical modeling outweigh those of dynamical modeling.

We have revised the manuscript to include these advantages and reference Xu's review. Although the full application of statistical forecast models is clearly too wide to synthesize, as we hope the Referee agrees, we have attempted to justify why the selection of a statistical modeling approach is valid in this case.

**Comment:** *Methods and Results are scattered over several sections. Reforming methods into a 'Section 4 Methods' and 'Section 5 Results' together with the use of sub-headings would help. I especially found it frustrating to have Sect. 7 after the results section. Surely this should not be hard to have the results divided by sub-heading for 'Sect. 5.1 Season-ahead' and 'Sect. 5.2 Extended Lead Time and Spatial Disaggregation of Regional predictions', or something similar.*

**Response:** We agree with this recommended restructuring. Our original intention was for Section 7 to serve as a supplement to the focus of the manuscript, however we fully acknowledge that integrating the topics of extended lead-time, spatial disaggregation, and prediction of wet/dry days (as recommended by Referee #1) throughout the manuscript is warranted and improves the flow. Changes to the manuscript include moving the technical details of these additional applications into the Introduction, Methods and Results (newly named sections as suggested) as appropriate. The authors are appreciative of the Referee's suggestion.

**Comment:** *The 'Summary and Discussion' section does an excellent job of outlining the practical implications of the work. However, it does not discuss results in light of the international forecasting literature. Is the degree of increased skill on par with other areas/forecasting approaches?*

**Response:** The Referee raises an interesting point. The skill achieved in this study surpasses that of existing approaches – namely dynamical models and simple Nino-based index models – as we hope has been illustrated and presented clearly. The challenge of course is putting this in the context of progress made elsewhere, and whether the improvements presented here represent a moderate or sizeable step forward. To be honest, comparing across climatologically diverse case studies is nontrivial. We can argue with some assurance that we have demonstrated improvement in comparison with other (existing) model structures for the same set of circumstances (i.e. same set of observations), however this may not hold true for a similar experiment in another location. Model performance is very site specific in our experience, including the “best” modeling approach.

We may argue that statistical approaches “typically” outperform dynamical models in predicting local precipitation, but this is not universal, and there are certainly a number of caveats. To this end, we have added a paragraph that discusses this idea and thank the Referee for highlighting this point:

“In this case, the statistical approach explored has produced results that are arguably more skillful than existing methods of precipitation prediction for this region of Peru. Therefore, one may be tempted to draw the conclusion that a statistical approach of this sort can be applied in a similar fashion at any other location of interest and produce equally skillful results. A conclusion along these lines would be temerarious. Although model frameworks are transferable to other locations, there are no guarantees that one approach will still be superior to another. Furthermore, there is no guarantee that observed increases in skill in one location will translate to expected equivalent increase in skill in another location.”

**Comment:** p. 3. Fig. 1: *Do white circles not represent SPCC stations, and blue the SENAMHI?*

**Response:** We thank the Referee for noticing this error. Indeed, the six white circles represent SPCC stations, and the blue circles represent SENAMHI stations. The caption of Fig. 1 has been revised accordingly.

**Comment:** p. 3. L. 5. *The elevation range in Peru is substantial. It would therefore be beneficial for an international audience to provide the mean or median and the range of elevation for the 29 precipitation stations.*

**Response:** The topography of the region is noteworthy. Section 2 of the manuscript has been revised as follows to provide this context:

“The topography of the region is noteworthy. While the 29 stations considered in the study cover an elevation range from 3,100 m to 4,600 m (Fig. 2, mean elevation 3870 m), this portion of southern Peru ranges from sea level at the Pacific Ocean to over 6,000 m in the high Andes.

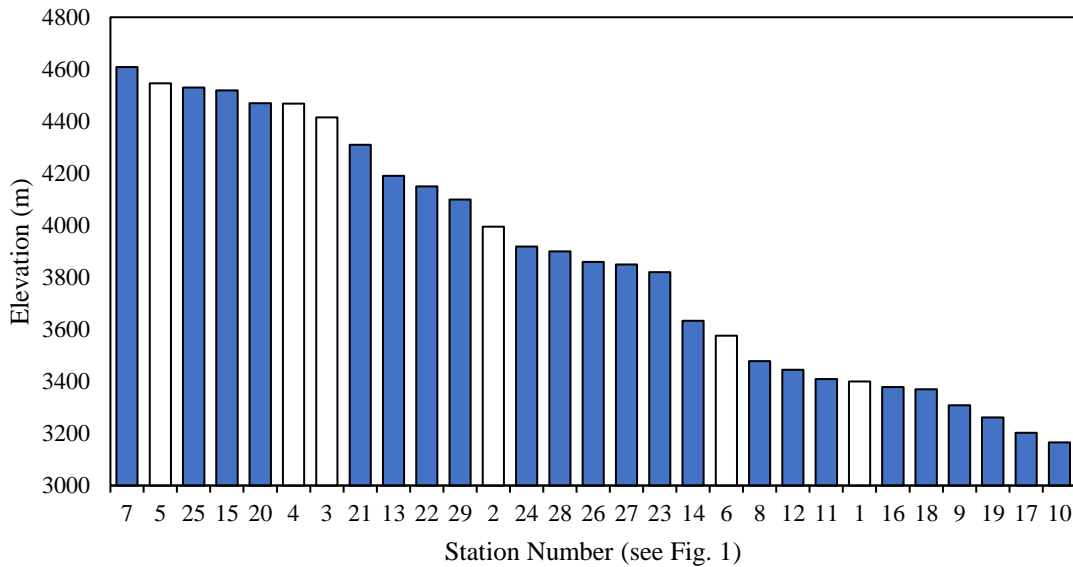

**Figure 2: Elevations of all 29 stations included in the study. Bars are numbered and colored in accordance with Fig. 1, with white bars representing SPCC stations and blue bars representing SENAMHI stations.”**

The station numbers referenced in Fig. 2 have been added to Fig. 1 to easily identify any station’s location within the region and quantify its elevation. Figure numbers throughout the remainder of the manuscript have been revised accordingly.

**Comment:** p. 4. L. 3. *What is the average correlation and is the method used Pearson?*

**Response:** The average Pearson’s correlation coefficient for the missing points is 0.92, implying that this interpolated data is reasonably representative of actual conditions not captured by the data. We have also clarified in the text that we are using Pearson correlation throughout.

**Comment:** p. 4. L. 21. *Agree a focus on JFM is justifiable. To help convince the reader that forecasting the wettest season is relevant to water resources/drought perhaps worth mentioning that it is during the wet season that reservoir/aquifer stores are replenished for use during dryer summer months. Being able to skillfully forecast anomalously low precipitation for the wet season is indeed valuable.*

**Response:** The following passage has been added to the manuscript to reflect the relevance of seasonal precipitation to regional hydrology and water resources management:

“JFM precipitation represents, on average, more than two-thirds of annual precipitation for the region, with some locations receiving up to 85% of annual precipitation during the three-month period. This precipitation

is crucial to the region's economic activities and environmental stability. During the rainy season, for example, surface reservoirs and underground aquifers are replenished for multi-sectoral water resource use during the dry conditions that characterize the rest of the year. These rains also directly impact the phenology of many wild plants and agricultural operations, and are intrinsically tied to the function of quebradas, or seasonal creeks, that drain the region. As mentioned, severe and wide-reaching economic, environmental, and societal consequences can be realized in an abnormally dry rainy season. Thus, JFM is identified as the season of interest for this study.”

**Comment:** p. 5. L. 2. *Referring to both EOF and PCA throughout. Stick with one to avoid confusion.*

**Response:** We apologize for the confusion and acknowledge that indeed EOF and PCA refer to the same process. Our intent in using both terms is to distinguish between the spatial patterns (EOF) and temporal trends (PCs) that come out of this process and provide complimentary information. Thus, we have opted to use both EOF and PC (and PCA as a descriptor of the process), and have also added a sentence to make this explicitly clear:

“To evaluate the spatial and temporal patterns of regional precipitation, a principal component analysis (PCA) is performed on JFM seasonal precipitation totals (von Storch and Zwiers, 2001) based on data from the 29 stations. In PCA, a dataset is decomposed into orthogonal, uncorrelated modes representing distinctive signals, or variance, present in the dataset. PCA yields information describing both spatial patterns (empirical orthogonal functions, EOFs) and temporal trends (principal components, PCs) of variance experienced in the dataset...”

**Comment:** p. 5&6. Fig. 3&4. *It was not clear to me why PCA was used for the observed JFM precipitation totals? What purpose does it serve if the main target for the PCR model is for areal averaged precipitation totals anyway? Also, it is not stated what the physical interpretation of PC2 and PC3 are in this context (i.e. p. 9. L. 26. and p. 10. L. 9.). As it stands Fig. 3 does not really add anything. It is too difficult to see any difference the size of the red dots. Perhaps adding a scale and/or some gradual colour scale would help? Could you include what elevation threshold the topographic shading represents?*

**Response:** PCA was performed on JFM precipitation using all stations individually to understand how the first PC (explaining the most variance of all signals across the stations) compares with the station average across the region. The idea is to simply justify if the station average is a good representation of individual stations. In general, station averaged precipitation total correlates well with station-level data, however the variance experienced at each station is clearly not identical, as expected. We have clarified this in the text by adding:

“... Additionally, the first principal component (PC) of the precipitation time series captures 51% of the variance in the data, and correlates well with station-averaged JFM seasonal precipitation observations ( $r = 0.99$ ; Fig. 4). This exceptional level of correlation between the averaged observations and its first PC (as well as high levels of correlation between this first PC time series and individual station data) suggest that the station-averaged time series is an appropriate representation of regional precipitation.”

Although the dominant signal present in this dataset correlates highly with the station-averaged time series, we do not mean to imply that higher modes of variance do not have an impact on regional precipitation. Referee #1 made a similar comment inquiring about the nature of PC2 and PC3. As per our response to Referee #1:

The Referee highlights a good point, and we agree that it should be further clarified and discussed. The first mode clearly explains the majority of the variance in data (50%), and the second mode captures an additional ~20% of variance; however, the third drops to ~5%. Only these three modes are investigated in this study, for a cumulative total of 75% of variance captured. The manuscript has been revised to state the variance explained by each mode considered. Indeed, as suggested by the Referee, the second EOF suggests a dipole pattern; this description has also been added to the revised manuscript.

As referenced in the manuscript, Eklundh and Pilesjö (1990) postulated that high correlations between the first EOF of gridded precipitation and area averaged precipitation may suggest the presence of a large-scale climatic phenomena acting homogeneously on regional precipitation. Additional studies that support this notion include Ogallo (1980), Mallants and Feyen (1990), Bisetegnè et al. (1986). While we use a station average precipitation time series (and not area averaged, as noted by the Referee), the high correlation coefficient between this time series and the first PC of the original set of data may still be interpreted as a widespread homogeneous influence on regional precipitation by a large-scale climatic phenomenon. With a correlation between the first principal component of regional JFM precipitation and JFM Niño 3.4 of -0.52, it is likely that this PC describes the modulation stemming from ENSO. As the Referee mentions, the subsequent PCs likely describe regional and local perturbations.

The studies mentioned in this response are now referenced in the manuscript. In addition to this response to Referee #1, the following passage has been added:

“While the first EOF likely illustrates ENSO’s influence on regional precipitation, it is possible that higher order modes may describe other climatic and topographic forcings such as interconnected large-scale climatic phenomena or observed orographic effects. For example, the second EOF exhibits a dipole pattern, which may be related to the rain shadow phenomenon that causes the northeastern portion of the region to be wet and southwestern to be dry.”

Finally, we removed Fig. 3 entirely and instead described the information more explicitly in text:

“... Even with significant changes in elevation across the region, the sign of the first EOF spatial pattern of all stations is negative (and at similar magnitudes) generally implying spatial homogeneity (Eklundh and Pilesjö, 1990) of JFM seasonal precipitation within this relatively small region. Additionally, the first principal component (PC) of the precipitation time series captures 51% of the variance in the data, and correlates well with station-averaged JFM seasonal precipitation observations ( $r = 0.99$ ; Fig. 4).”

Figure numbers throughout the remainder of the manuscript have been revised accordingly.

**Comment:** p. 6. L. 12-13. *Am I correct in thinking none of the precipitation stations used here are within the rain shadow?*

**Response:** Technically, the Atacama Desert is the manifestation of the Andean rain shadow. While no precipitation stations used in this study are located there (although some are located at its edge), this portion of the Andes is unique in the sense that the mountain range is at its widest. Instead of an abrupt switch between wet and dry conditions as might be expected by some other notable rain shadows in the world, the Altiplano (and the majority of the stations used in this study) exists in a transitional zone of sorts and exhibits a wet to dry gradient from northeast to southwest.

**Comment:** p. 7. Fig. 5: *Add units of SST anomalies (i.e. °C)? You could improve plot by adding two horizontal lines to represent El Niño/La Niña thresholds (i.e.,  $\pm 0.5^\circ\text{C}$ ). Also, define that you are using Pearson’s correlation coefficient in the first instance (in the text) and define symbol as  $r$ . Then use  $r$  in every instance throughout the paper for clarity. I note this is done in some places and not in others (e.g. p. 9. L. 30.).*

**Response:** We appreciate the suggestion to include thresholds in Fig. 5; they have been added to the figure and are referred to in the text and figure caption as follows:

“... Strong El Niño (warm SST) conditions in the Niño 3.4 region are typically associated with drought in southern Peru, whereas La Niña (cool SST) conditions often align with wetter-than-average conditions (Fig. 5, El Niño and La Niña thresholds of  $0.5^\circ\text{C}$  and  $-0.5^\circ\text{C}$ , respectively, included for context).

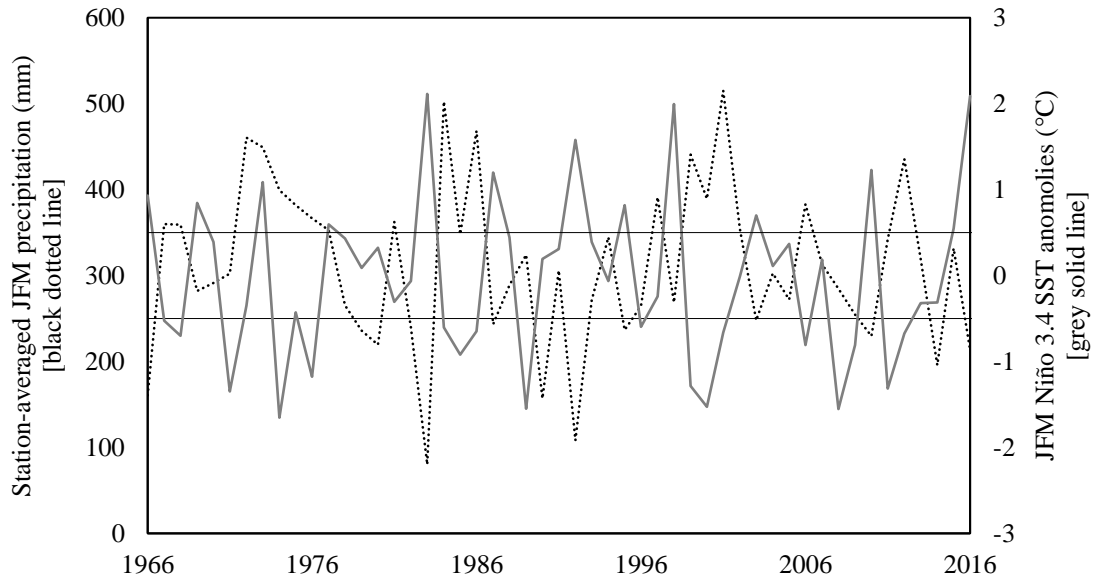

**Figure 5: Station-averaged JFM precipitation and concurrent JFM Niño 3.4 SST anomalies ( $r=-0.57$ ). El Niño and La Niña thresholds marked with black solid line. During the period of record, 13 JFMs exceeded the El Niño threshold ( $0.5^{\circ}\text{C}$ ) and 18 years the La Niña threshold ( $-0.5^{\circ}\text{C}$ )."**

We have also revised the manuscript to define our use of the Pearson correlation coefficient at its first instance and replaced subsequent references to correlation with the symbol  $r$  where appropriate.

**Comment:** p. 10. Fig. 7: *Why use the first PC of regional JFM precipitation instead of just the area-averaged JFM precipitation total? I do note these are very similar and map would look the same.*

**Response:** We agree with the Referee that these two maps do look quite similar, and there may be motivation for simply presenting the station-average for simplicity; however, we have opted to present PC1 of the regional precipitation to highlight the dominant signal modulating precipitation. Again, this may look similar to the station-average, but it does not necessarily need to. Further, by evaluating PC1, we can identify distinct regions of SST, etc. that may lead us to better understand the controlling factors or phenomena (e.g. ENSO) that may be less obvious or evident using station-average. Then, this can be repeated for additional PCs to understand other (orthogonal) signals. Fig. 7 serves simply as an example of this type of analysis for predictor identification.

**Comment:** p. 12. L. 3. *"the JFM precipitation series"... but which one? First PC or observed totals?*

**Response:** The global wavelet analysis was performed on the JFM observed totals. We appreciate the clarification and have amended the manuscript to explicitly state this.

**Comment:** p. 13. Table 1. & L. 1-4. *The use of the asterisks is a little confusing. When I first looked at table 1 I presumed the asterisks was for statistically significant correlations. But are these instead those that are NOT correlated with JFM precipitation? Although you say that all are significant with at least one of the first three PCs. I can see here how perhaps the use of the first three PCs is useful but the reader is left with a bit of a jump to understand this without understanding what PC2 and PC3 represent. Could adding three additional columns to the right hand side of Table 1 for PC1, PC2, and PC3 help with this, then have the asterisks marking any value with statistically significant correlations. This allows the reader to see that perhaps one climate variable is correlated with all four precipitation series, or just e.g. PC3?*

**Response:** We apologize for the confusion and have revised Table 1 as well as the associated text.

“In total, 11 potential predictors are identified for prediction of station-averaged JFM precipitation based on previous literature and inference from spatial correlation maps, composite maps, and global wavelet analysis (Table 1). These potential predictors include both established climate indices and relevant regions of SST, SLP, and GH (as well as gradients of these variables).

All potential predictors included display a statistically significant correlation with at least one of the first three PCs of the station-averaged precipitation time series. In addition, five potential predictors are also statistically significant correlated with the station-averaged times series of precipitation, and marked with asterisks in Table 1.

**Table 1: The suite of potential predictors for JFM precipitation; correlations are based on JFM total precipitation and spatial averages across the regions noted, with statistically significant correlations marked with an asterisk.**

| Name         | Large-scale climate variable | Timeframe     | Region                   |               | Corr. w/ JFM precip. | Most Correlated PC (Corr) |
|--------------|------------------------------|---------------|--------------------------|---------------|----------------------|---------------------------|
| Niño 3.4     | SST                          | OND           | 5° N-5° S                | 170° W-120° W | -0.53*               | PC1 (-0.52)               |
| PDO          | SST                          | OND           | all areas north of 20° N |               | -0.19                | PC2 (-0.35)               |
| NP           | SLP                          | D             | 65° N-35° N              | 160° E-140° W | -0.18                | PC3 (0.28)                |
| WHWP         | SST                          | OND           | 28° N-8° N               | 110° W-40° W  | -0.16                | PC3 (-0.32)               |
|              | SST                          | OND           | 0° -5° S                 | 160° W-140° W | -0.54*               | PC1 (-0.54)               |
|              | SLP                          | D             | 35° N-20° N              | 150° W-135° W | 0.15                 | PC2 (-0.36)               |
|              | SST gradient                 | OND           | 0° -15° S                | 15° W-35° W   | 0.30*                | PC2 (-0.29)               |
|              |                              |               | (25° S-40° S)            | (15° W-35° W) |                      | PC3 (0.28)                |
| SST gradient | OND                          | 50° N-40° N   | 150° W-135° W            | 0.38*         | PC3 (-0.37)          |                           |
|              |                              | (35° N-30° N) | (180° -165° W)           |               | PC2 (0.27)           |                           |
|              | GH 200 hPa                   | D             | 10° S-15° S              | 70° W-65° W   | -0.35*               | PC1 (-0.31)               |

**Comment:** p. 14. L. 18-19. *Not clear how the ensemble in Fig. 10 was created. More detail needed here. Also, how many ensemble members etc.?*

**Response:** We agree that this may not have come across clearly in the original manuscript. Referee #1 made a similar comment in their review of the manuscript. As per our response to Referee #1:

Hindcasts for precipitation prediction are performed using principal component regression in a drop-one cross-validated mode. This includes – for each year of the hindcast – dropping the predictor data (Z) from the year being hindcasted, forming new PCs (and EOFs) conditioned on the remaining years, and fit to observations using multiple regression, providing an intercept coefficient, regression coefficients, and error term. The predictor data (Z) from the year dropped are then projected onto the EOFs to provide PCs for the dropped year. Finally, these PCs are multiplied by the appropriate regression coefficients and added to the intercept coefficient to provide a deterministic precipitation prediction for the dropped year. This is repeated for each year.

To create ensemble hindcasts, error terms from all years are assembled and a distribution is fit (using a kernel density estimator; the distribution is approximately Gaussian). For each hindcast year, 1,000 random draws from the distribution are added to the deterministic precipitation prediction to form an ensemble.

The manuscript has been revised accordingly to clarify this process.

**Comment:** p. 15. L. 6. *A few issues with this sentence. Suggest changing to something like: “An RPSS value less than zero signifies no forecast skill over the reference climatology forecast (i.e. it is ...), a value equal to zero for when the forecast is only as skillful as climatology, and values greater than zero represents a skillful forecast. A value of one represents a perfect forecast”.*

**Response:** We appreciate the Referee’s suggestion to restructure this sentence. The text of this passage now reads:

“An RPSS value less than zero signifies no forecast skill over the reference climatology forecast (i.e. the information provided by the developed forecast model is statistically less accurate than that provided by climatology), a value equal to zero for when the forecast is only as skillful as climatology, and values greater than zero represents a skillful forecast. A value of one represents a perfect forecast”.

**Comment:** p. 15. L. 9-14. *Need more details about the use of 3x3 contingency tables, you might find the Svensson (2016) paper (and references therein) useful for this and as an example of statistical seasonal forecasting more generally. Also, more definition of what is meant by “extremely dry conditions”. I know this is mentioned in the results, but it should be here that the methods details are given.*

**Response:** The authors thank the Referee for the reference, which has been added along with the following paragraph to clarify this point:

“... Results are presented in a three-by-three matrix, or contingency table, that illustrates the performance of the model for each category. Contingency tables are an alternative method of assessing the precision of model predictions that relies on categorical probabilities as opposed to simpler methods such as correlation (Svensson, 2016). Of particular interest in this study is the hit rate statistic, or the percentage of time the model accurately predicts (categorically) the actual observed condition. In addition, because prediction of regional drought is of particular interest, the likelihood of extremely dry conditions is also considered. For this case, extremely dry conditions are defined as station-averaged JFM precipitation totaling less than 250 mm, which occurs approximately 25% of the time, or approximately in 13 years across the time series.”

**Comment:** p. 15. L. 16-18. Which combinations of the 11 predictors in Table 1 made it into the final PCR model? I know PCA was used, but can weight be given to original 11 predictor variables? For example, can I tell how important, if at all, Niño 3.4 is to the final model?

**Response:** The Referee raises a good point that we did not explicitly address in the manuscript. While we used the Generalized Cross-Validation (GCV) skill score considering all 11 potential predictors to determine the optimal number of PCs to retain as predictors (i.e., 4), we did not present results on how the inclusion or exclusion of subsets of the 11 variables changed overall skill performance. We have now partially addressed this in the revised manuscript by evaluating the difference in model skill for a second model construct, one in which Niño 3.4 and SST from 160° W-140° W 0° -5° S are dropped from the pool of potential predictors. While this is not exhaustive, these two predictors are the most highly correlated with JFM precipitation (and intrinsically are highly correlated with one another), and the differences in skill can give indication of the value in retaining this particular predictor – even though a PCA structure is used. The following text has been added to the Discussion section:

“The intent of this research was to explore the importance of including additional climate information in a predictive model that incorporates ENSO-based indices. To determine the importance of a model that does not include information regarding SST in the equatorial Pacific, a second hindcast model is developed using only 9 of the 11 original potential predictors. Niño 3.4 and SST from 160° W-140° W 0° -5° S are dropped in the modified model construct. Using the same cross-validated PCR methodology (as well as GCV to



determine the optimal number of potential predictor PCs to incorporate, i.e., 3), we produce hindcasts for the period of record (Fig. 13).

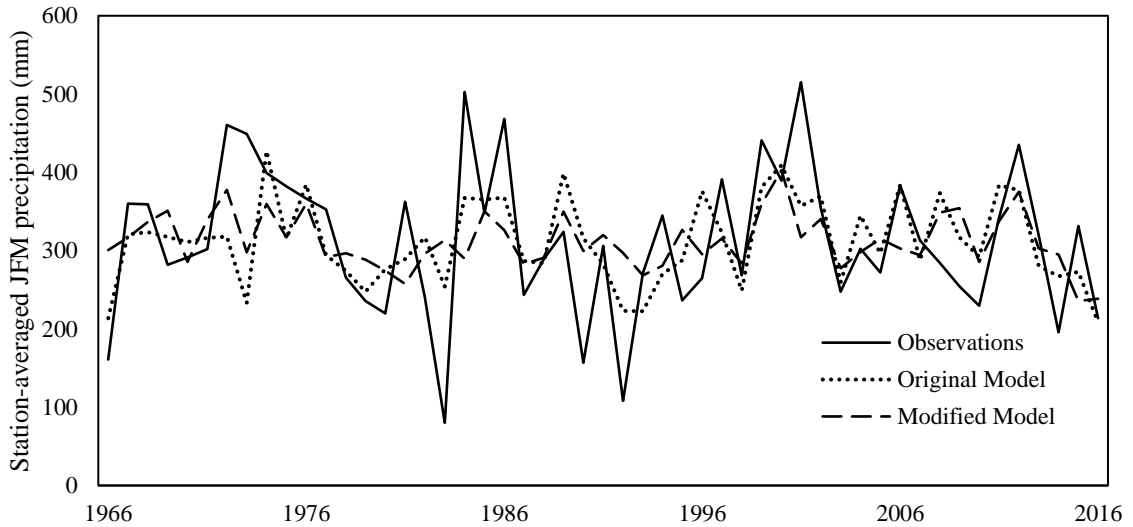

**Figure 13: Observed conditions for the period of record, as well as hindcasts produced using the original model (11 potential predictors, 4 PCs) and the modified model (9 potential predictors, 3 PCs).**

When comparing the results of the modified model to the original model, the importance of including ENSO in a model construct for precipitation prediction in southern Peru is highlighted. For example, the correlation coefficient between predicted conditions and observations for the modified model drops from  $r = 0.58$  to  $r = 0.37$  (still statistically significant, but skill reduced by roughly one-third). In addition, RPSS drops to only 0.05% from the original 16%, indicating that the information provided by the modified model is just barely more useful than that provided via climatology. In considering the hit-miss metric, the diminished skill of the modified model is also visible (Table 4).

**Table 4: Hit-miss matrix for the modified model with three equal categories: above normal (A), near normal (N), and below normal (B) precipitation.**

|                     |   | Predicted conditions |           |          |
|---------------------|---|----------------------|-----------|----------|
|                     |   | A                    | N         | B        |
| Observed conditions | A | <b>6</b>             | 10        | 1        |
|                     | N | 0                    | <b>15</b> | 2        |
|                     | B | 1                    | 14        | <b>1</b> |

Above normal (A), near normal (N), below normal (B)

The modified model displays an evident bias towards predicting near normal conditions (more than 75% of the time). While the hit score of this model is reduced to 43%, more striking is the fact that the modified model produces an instance in which above normal conditions are prognosticated, but instead below normal conditions are experienced, arguably a more devastating forecast error in this region than the opposite situation (predicted below normal, experienced above normal). These metrics only reflect the critical importance of considering ENSO in regional precipitation prediction.”

**Comment:** p. 16. L. 5-7. *The main message I get from Table 2 is that Near normal and Below normal precipitation is good, but it is the above normal that drags the hit rate to 51%.*

**Response:** This interpretation is accurate. Because of this, we explored the additional hit-miss matrix to evaluate above normal/near normal and extreme below normal precipitation predictions. Text has been added to the manuscript to explicitly state this interpretation.

**Comment:** p. 17. Sect. 7. *I like the idea of extended lead time analysis, but the technical details should be first outlined in the proposed 'Methods' section and results presented under a sub-heading within the 'Results' section.*

**Response:** As recommended by a previous comment, we have redistributed the technical details of the auxiliary applications to the 'Methods' section under appropriate subheadings. The results of these analyses are presented similarly in the 'Results' section.

**Comment:** p. 18. Fig. 12: *I'm missing how you are going from regional level to station level here. The extended lead time is good, but the spatial disaggregation is the weakest part of the analysis at present.*

**Response:** In an effort to more explicitly explain the spatial disaggregation portion of the study, the following text has been added to the manuscript:

“... Using the regional-level categorical prediction probabilities for each year (above normal, near normal, and below normal; Fig. 12), ensemble predictions for each station are generated based on that station's own climatology. For example, the categorical probabilities at the regional-level for 2016 are predicted as 2% above normal, 7% near normal, and 91% below normal. For each station, JFM precipitation observations from all other years (excluding 2016) are randomly selected 1,000 times from that station's JFM precipitation distribution conditioned on the regional probabilities. Thus, the ensemble of predictions for that station for 2016 will have approximately 91% of its members from the below normal category, 7% near normal, and 2% above normal.

The purpose of spatially disaggregating in this fashion is to maintain the statistical integrity of the regional-level prediction while reflecting appropriate magnitudes of precipitation experienced at different locations (Maraun, 2013). Station-level predictions are evaluated using the same metrics previously described.”

**Comment:** p. 19. L. 6-9. *What statistical test is used to determine if the difference between regional and station correlation values is statistically significant or not?*

**Response:** Because the regional and station values are related, a dependent t-test for paired samples was used. The purpose of this statistical test is to search for significant changes or differences between two dependent variables. The goal of disaggregation was to produce a scaled precipitation forecast for local stations that maintained the statistical integrity of the regional prediction. Thus, a dependent t-test result of no statistically significant change is desired. We have clarified this in the revised manuscript.

**Comment:** p. 19. Sect. 8. *There is no discussion of the key limitations of the forecasting method/model (e.g. poor for above average precipitation). It would be good here to offer some suggested avenues for further research to overcome such methodological limitations.*

**Response:** We agree with this Referee comment. We will include a paragraph in the discussion section of the revised manuscript that explicitly discusses limitations, including poor performance in predicting above average precipitation conditions, the regional versus local nature of predictions and associated skill, real-time data requirements and trade-offs with longer prediction lead time, etc. In addition, we will outline potential avenues for further research such as alternative modeling approaches and integration with hydrology and other sectoral/decision-making models.

**Comment:** *I like the final paragraph on p. 20 as it highlights well the practical importance of seasonal forecasting using climate information in a region where none is currently available.*

**Response:** We truly do hope that the work undertaken by our group will be of practical use to stakeholders in the region. To clarify, though, it was not our intention to frame this study as the Prometheus of seasonal forecasting for the people of southern Peru. Certain national and local entities (both public and private) currently do employ forecasting techniques to predict regional precipitation to varying extents. For example, SENAMHI uses Niño index-based forecasts and SPCC has explored and developed predictive models that employ artificial neural networks. Instead, the purpose of this study is to expand on the region's existing capacity to predict precipitation. The manuscript has been edited to reflect this sentiment in a more appropriate and explicit manner.

#### **Minor Comments (all accepted and corrected in the manuscript)**

- p. 1. L. 28. Change “vary drastically” to e.g. “vary considerably”
- p. 2. L. 19. Change “wreaked havoc” to e.g. “was particularly severe”
- p. 2. L. 26. Change “The dire” to e.g. “The societally challenging”
- p. 4. Fig. 2. Add “...using data from 29 precipitation stations in Sect. 2” to caption.
- p. 5. L. 7. The Eklundh and Pilesjö (1990) reference is for Ethiopia. Should reference go after “homogeneity” instead?
- p. 6. L. 11. Add a comma in (Garreaud, 1999)
- p. 8. L. 5-8. Very short paragraph, better added to the previous one
- p. 9. L. 3. Change “hydrometeorologic” to “hydrometeorological”?
- p. 9. L. 21. Change “previously identified” with “identified in Sect. 3”
- p. 10&11. Fig. 7&8. Worth adding a dot/circle to mark study region on the maps for an international audience?
- p. 11. L. 1-5. Delete section as repeated from p. 10.
- p. 13. Table 1. Add space between ‘Time frame’
- p. 18. L. 9. Add full stop after “...etc.)”
- p. 1. L. 19. Add “regional” and “totals” in front of and after “January-March precipitation”, respectively.

#### **References**

- Maraun, D.: Bias Correction, Quantile Mapping, and Downscaling: Revisiting the Inflation Issue, *J. Climate*, 26, 2137–2143, 2013.
- Svensson, C.: Seasonal river flow forecasts for the United Kingdom using persistence and historical analogues, *Hydrol. Sci. J.*, 61(1), 19–35, 2016.
- Van Loon, A. F.: Hydrological drought explained, *Wiley Interdiscip. Rev. Water*, 2(4), 359–392, 2015.
- Xu, C.: Climate Change and Hydrologic Models: A Review of Existing Gaps and Recent Research Developments. *Water Res. M.*, 13, 369-382. 1999.
